# Supplementary material
Source: publisher figshare collection journal article supplement (https://frontiersin.figshare.com/ndownloader/files/12800117)
Supplement: Supplementary file [file 12800117]

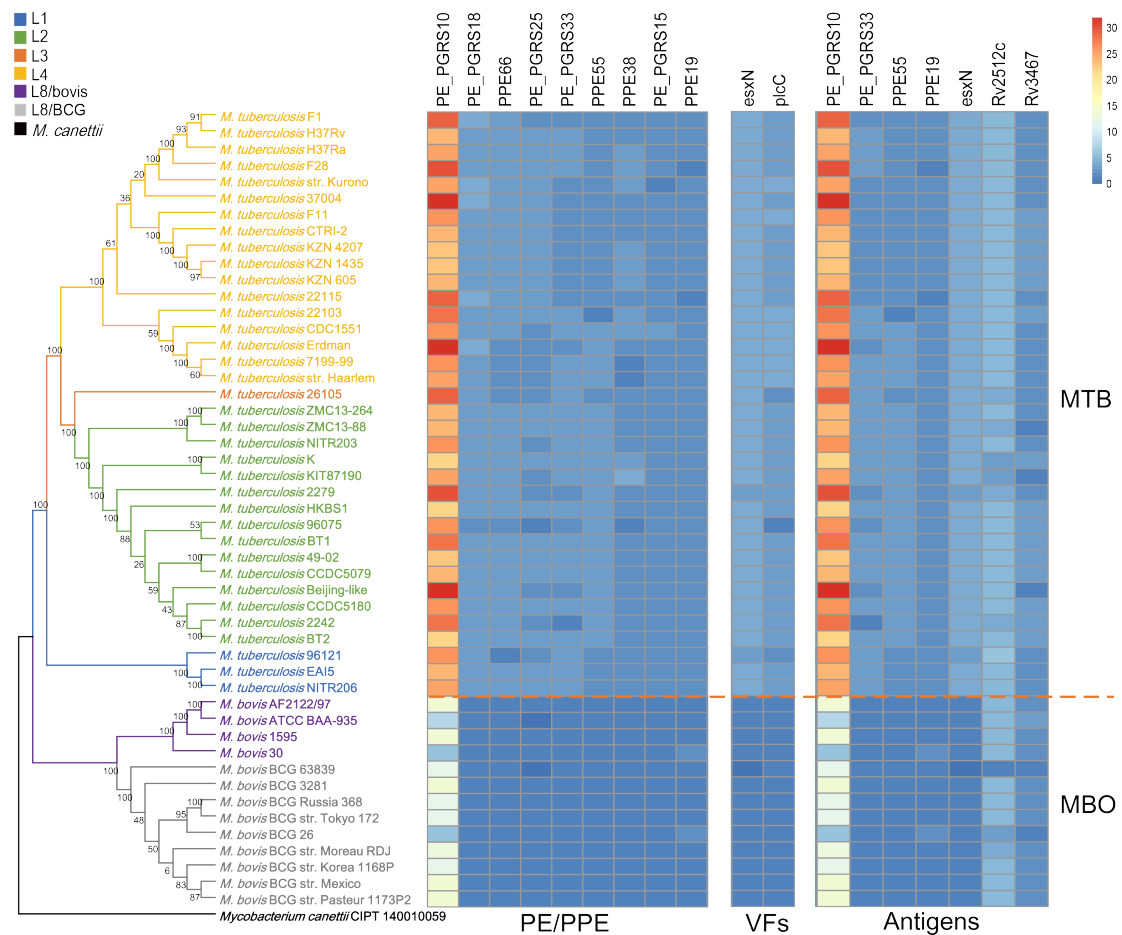

**Supplementary Figure S7.** Copy number of the 13 Mtb PE/PPE, virulence, and antigen SCGs in the Mtb/Mbo strains. Rows represent the 36 Mtb and 13 Mbo strains, and columns represent the PE/PPE, virulence, and antigen SCGs. The color intensity indicates the copy number of each gene.
